# Supplementary material
Source: PubMed Central journal article supplement (PMC5039079)
Supplement: NIHMS807641-supplement-supplement_1.pdf [file NIHMS807641-supplement-supplement_1.pdf]

**Supplementary Table for Figure 1:** Calories of Added sugar consumed by US children and adults 1977-2012

| Survey year                  | Beverages  |                | Foods      |                |
|------------------------------|------------|----------------|------------|----------------|
|                              | Calories   | Standard error | Calories   | Standard error |
| <b>Children 2-18y</b>        |            |                |            |                |
| 1977-1978                    | 112        | 3.22           | 163        | 2.75           |
| 1989-1991                    | <b>136</b> | 4.95           | 163        | 5.24           |
| 1994-1998                    | <b>192</b> | 5.60           | <b>198</b> | 5.12           |
| 2003-2004                    | 208        | 8.31           | <b>179</b> | 4.13           |
| 2009-2010                    | <b>165</b> | 6.63           | <b>163</b> | 3.19           |
| 2011-2012                    | 157        | 5.23           | 168        | 4.48           |
| <b>Adults 19 y and older</b> |            |                |            |                |
| 1977-1978                    | 109        | 2.25           | 119        | 2.11           |
| 1989-1991                    | <b>121</b> | 3.44           | 122        | 3.09           |
| 1994-1998                    | <b>165</b> | 4.22           | <b>147</b> | 3.58           |
| 2003-2004                    | <b>199</b> | 9.02           | 142        | 3.79           |
| 2009-2010                    | <b>162</b> | 4.95           | 138        | 2.41           |
| 2011-2012                    | 164        | 5.80           | 144        | 4.12           |
